# Supplementary material for: Anti-Staphylococcal, Anti-Candida, and Free-Radical Scavenging Potential of Soil Fungal Metabolites: A Study Supported by Phenolic Characterization and Molecular Docking Analysis
Source: MDPI journal article supplement (doi:10.3390/cimb46010016), 2023-12-28
Supplement: s1 [file s1]

## Contents

| Figure                                                                                                                  | Page |
|-------------------------------------------------------------------------------------------------------------------------|------|
| <b>Figure S1.</b> HPLC chromatogram of phenolic components in EtOAc extract from <i>T. harzianum</i> AUMC 15440.        | 3    |
| <b>Figure S2.</b> HPLC chromatogram of phenolic components in EtOAc extract from <i>T. harzianum</i> AUMC 15443.        | 3    |
| <b>Figure S3.</b> HPLC chromatogram of phenolic components in EtOAc extract from <i>A. aureolatus</i> AUMC 15441.       | 4    |
| <b>Figure S4.</b> HPLC chromatogram of phenolic components in EtOAc extract from <i>A. aureolatus</i> AUMC 15446.       | 4    |
| <b>Figure S5.</b> HPLC chromatogram of phenolic components in EtOAc extract from <i>T. nidulans</i> AUMC 15444.         | 5    |
| <b>Figure S6.</b> HPLC chromatogram of phenolic components in EtOAc extract from <i>A. terreus</i> AUMC 15447.          | 5    |
| <b>Figure S7.</b> HPLC chromatogram of phenolic components in EtOAc extract from <i>A. terreus</i> AUMC 15448.          | 6    |
| <b>Figure S8.</b> HPLC chromatogram of phenolic components in EtOAc extract from <i>P. crustosum</i> AUMC 15445.        | 6    |
| <b>Figure S9.</b> HPLC chromatogram of phenolic components in EtOAc extract from <i>P. novae-zeelandiae</i> AUMC 15442. | 7    |

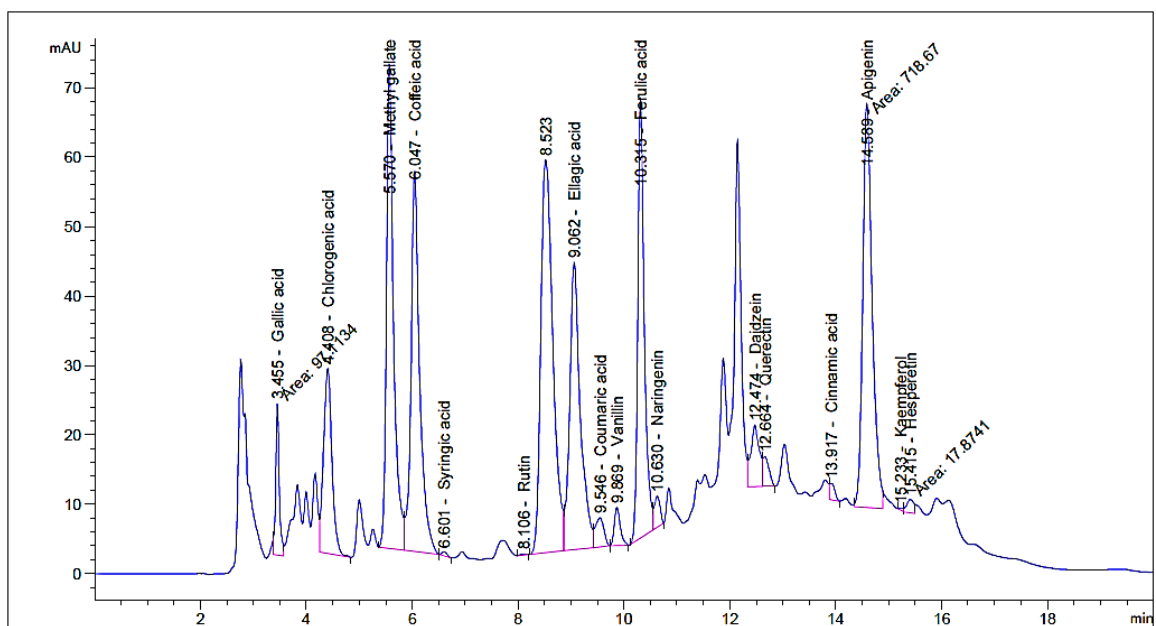

**Figure S1.** HPLC chromatogram of phenolic components in EtOAc extract from *T. harzianum* AUMC 15440.

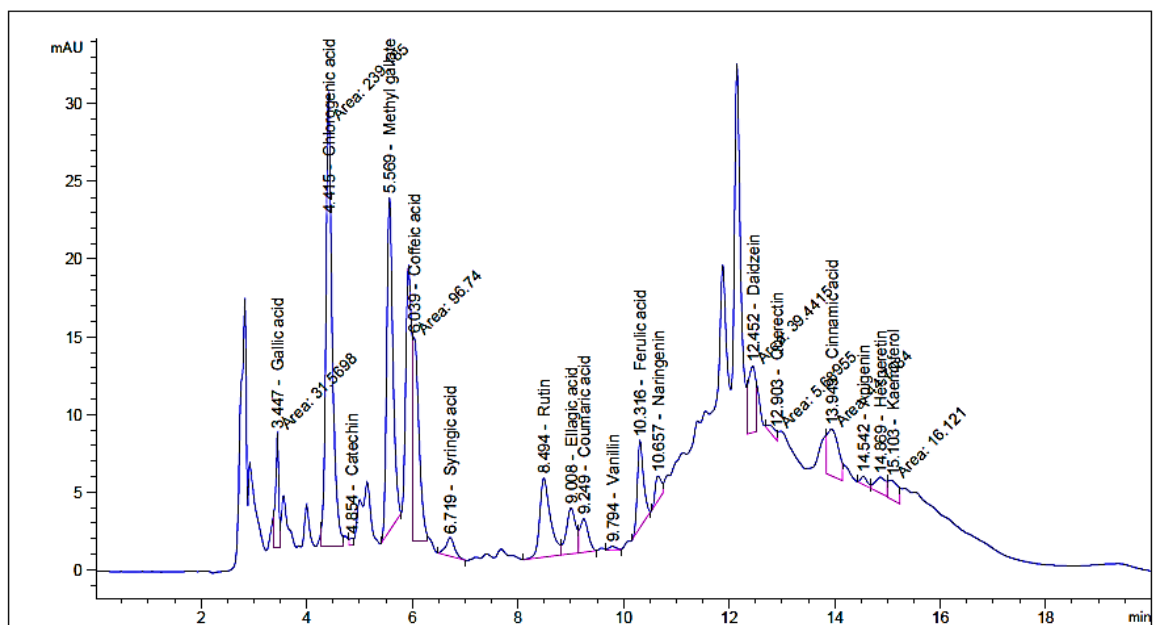

**Figure S2.** HPLC chromatogram of phenolic components in EtOAc extract from *T. harzianum* AUMC 15443.

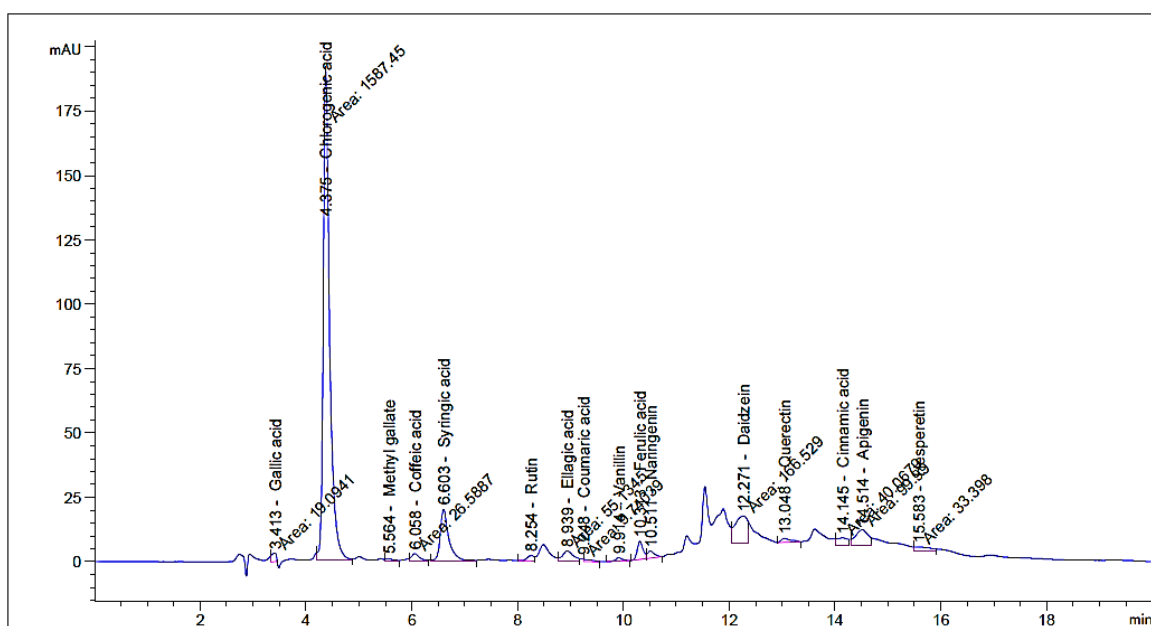

**Figure S3.** HPLC chromatogram of phenolic components in EtOAc extract from *A. aureolatus* AUMC 15441.

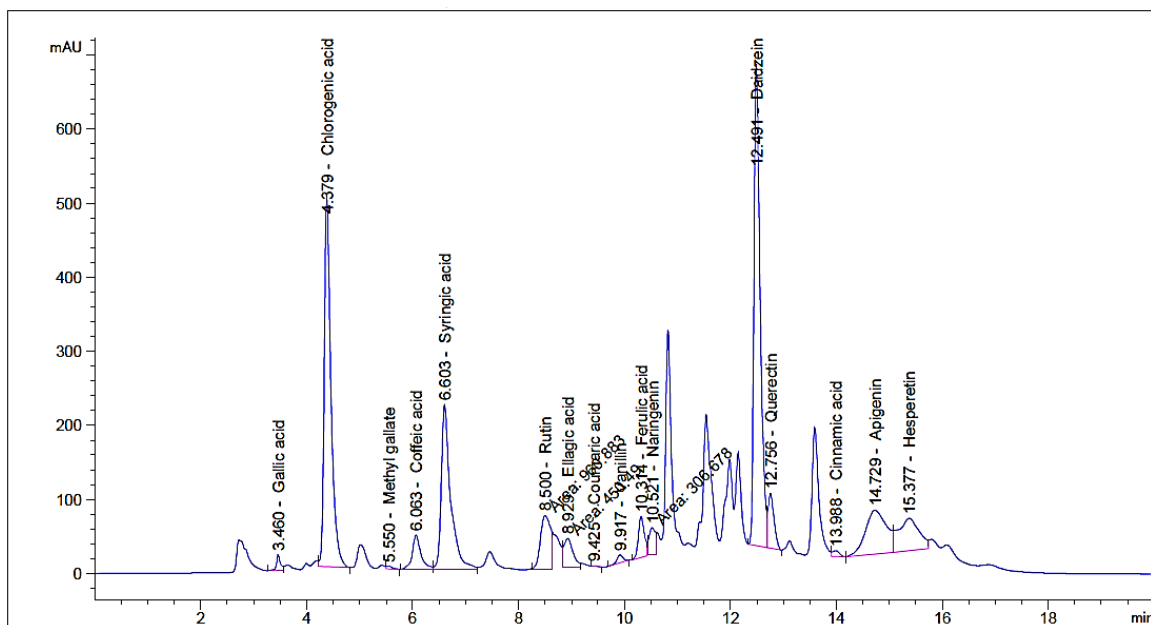

**Figure S4.** HPLC chromatogram of phenolic components in EtOAc extract from *A. aureolatus* AUMC 15446.

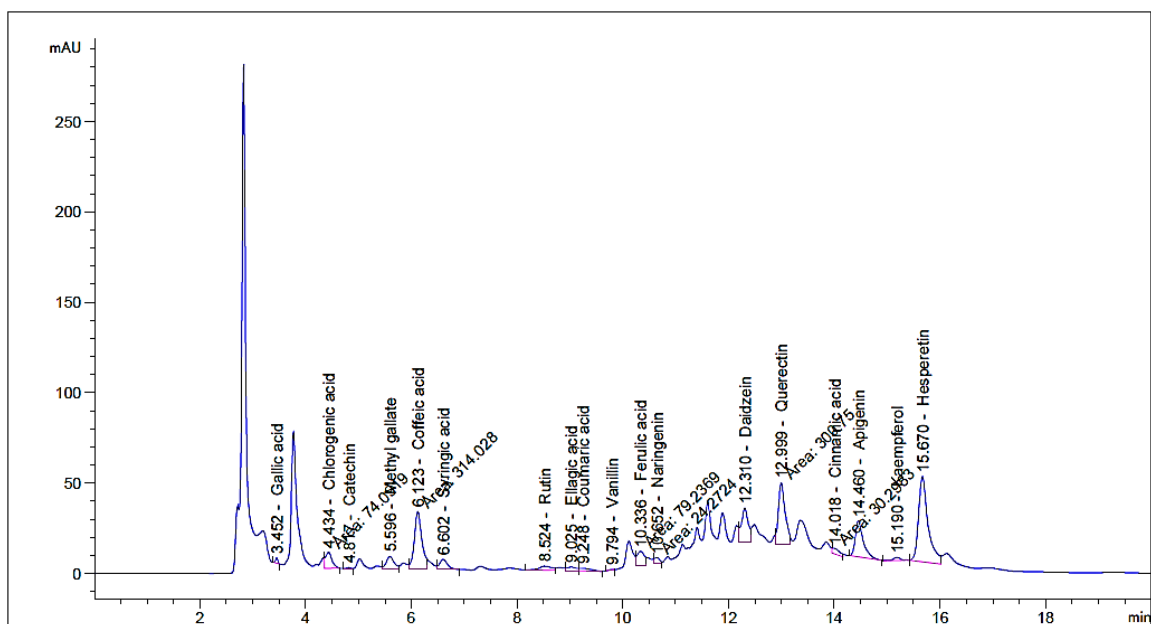

**Figure S5.** HPLC chromatogram of phenolic components in EtOAc extract from *T. nidulans* AUMC 15444.

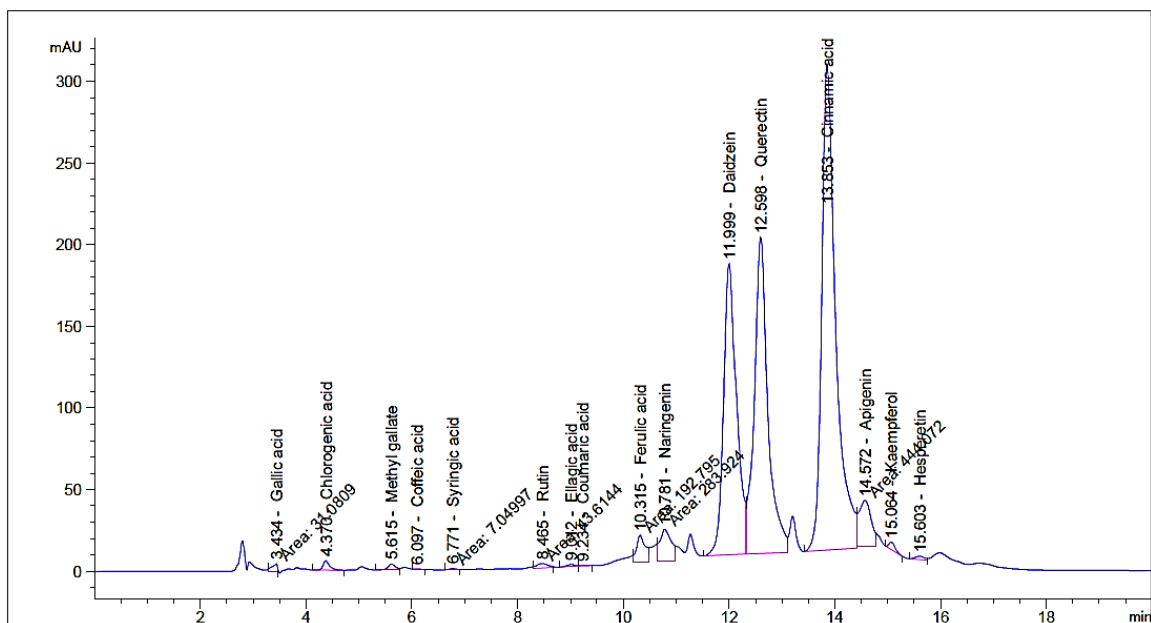

**Figure S6.** HPLC chromatogram of phenolic components in EtOAc extract from *A. terreus* AUMC 15447.

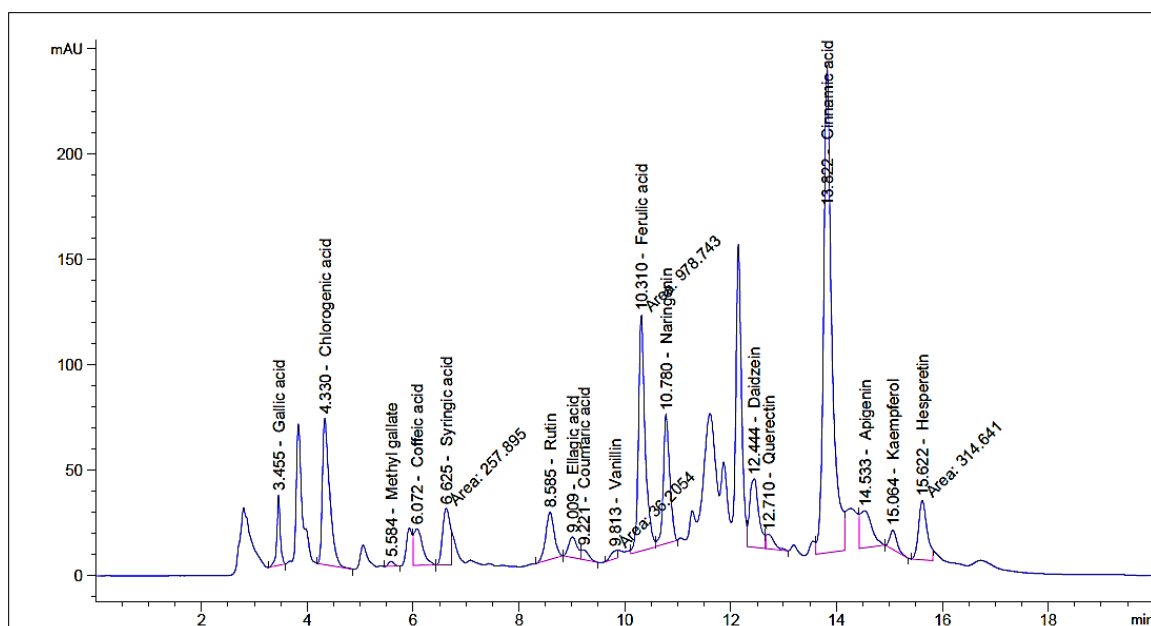

**Figure S7.** HPLC chromatogram of phenolic components in EtOAc extract from *A. terreus* AUMC 15448.

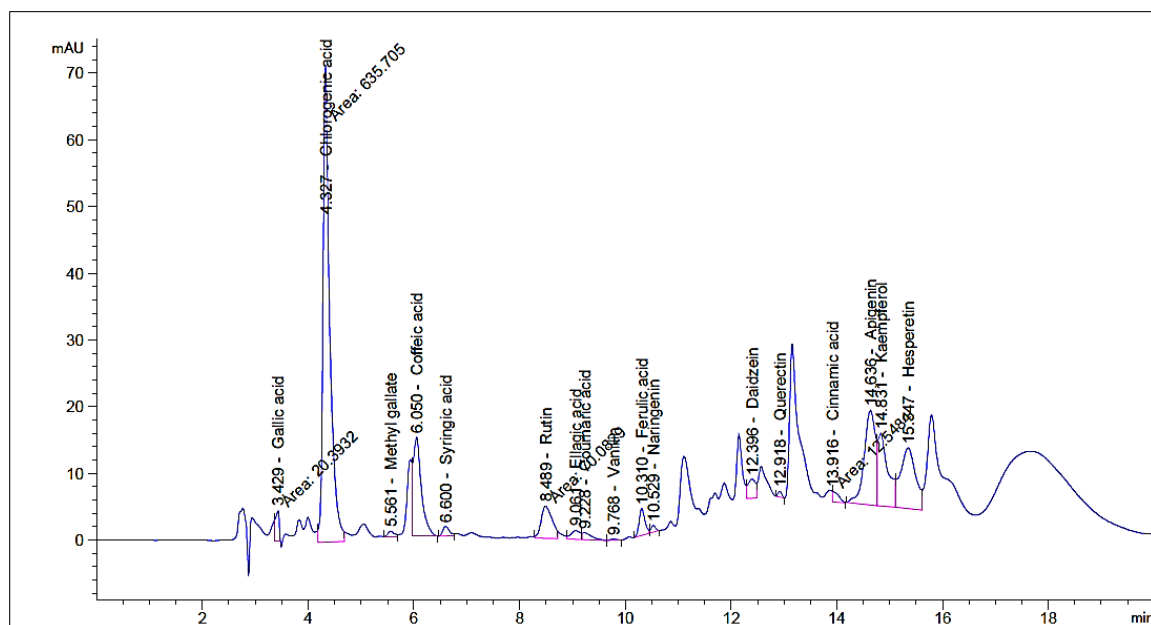

**Figure S8.** HPLC chromatogram of phenolic components in EtOAc extract from *P. crustosum* AUMC 15445.

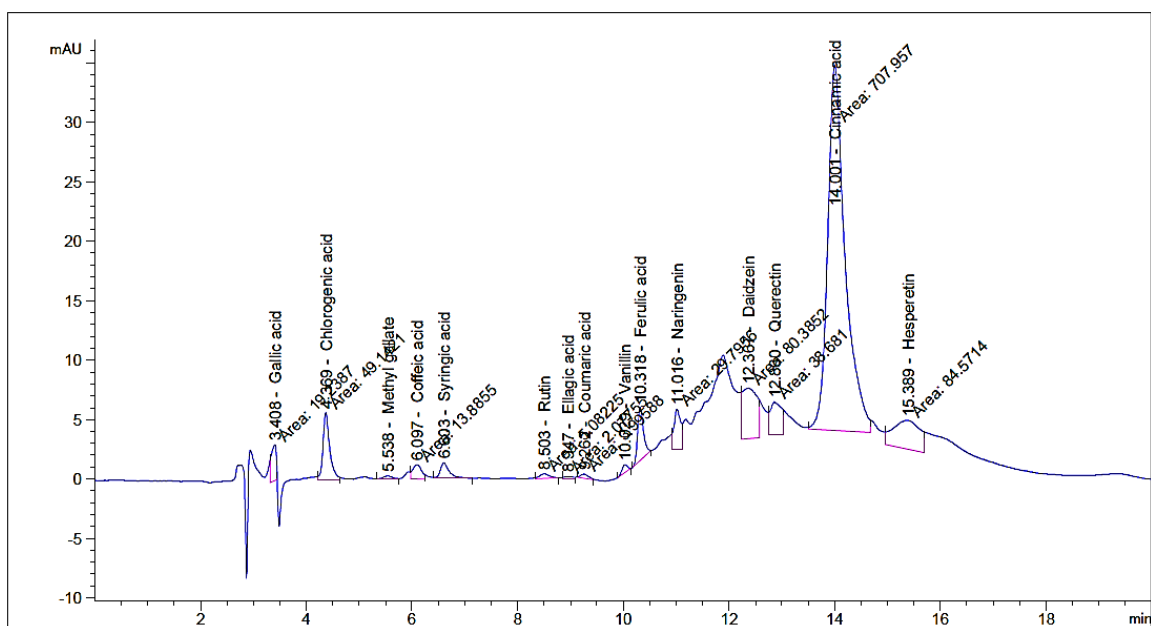

**Figure S9.** HPLC chromatogram of phenolic components in EtOAc extract from *P. novae-zeelandiae* AUMC 15442.
